# Supplementary material for: Neuropeptide Receptor Transcriptome Reveals Unidentified Neuroendocrine Pathways
Source: PLoS One. 2008 Aug 25;3(8):e3048. doi: 10.1371/journal.pone.0003048 (PMC2516173; doi:10.1371/journal.pone.0003048)
Supplement: Table S6 — List of the primers used for the Q-RT-PCR analysis. (0.03 MB XLS) [file pone.0003048.s006.xls]

## Sheet: Table S6
Table S6. List of the primers used for the Q-RT-PCR analysis.
GPCR	name	primer sequence
BNGR-A1	9974-f1	CATTTTCTACTGCCTCGTCATTCGG
BNGR-A1	9974-b1	TGGTTCACACATTGCGATGGAG
BNGR-A2	245327-f1	CATCGTGAGTGTATTTGTGGCAGC
BNGR-A2	245327-b1	CCGCTAACATTATGACCGCTTTATCT
BNGR-A3	40729-f1	CGCTTTCCTTAGCCGTTTGGAGATAC
BNGR-A3	40729-b1	CAATACGACCGCCGTGTGAATG
BNGR-A4	140090-f1	TCCATAACTGCCATTGCCCTTG
BNGR-A4	140090-b1	TGCTGTCACCCAGATGAAGAACATAG
BNGR-A5	234289-f1	CCGTCAACCCGCTGATTTACAAC
BNGR-A5	234289-b1	CTCAAACGAAGCCCCATTCTGTTC
BNGR-A6-A	273944-f1	CGGACTCGTTTGGTTCTTCGC
BNGR-A6-A	273944-b1	GAAAGTTATCTCCCAGACGGTGCC
BNGR-A6-B	269858-f1	CATACGAGCAGGACGAAGATGGAAC
BNGR-A6-B	269858-b1	TCCGAGTGGCACGATGAAGAAG
BNGR-A7	504692-f1	TCGTTCAGACACAAAAGAAAGCCG
BNGR-A7	504692-b1	GACTCCTCGTTGATGAGACGCAAT
BNGR-A8	512629-f1	TCTGACACTTTCATTGGCTATTTGGAG
BNGR-A8	512629-b1	CTCGTGAGTATTGCGATGCTACACC
BNGR-A9	218247-f1	CGAATCAAACGAACCAGAAGAAACC
BNGR-A9	218247-b1	TGGGTAGACCTTACGAAATGCCTG
BNGR-A10	561703-f2	ATCCGATCGTACCGGAATGTACAG
BNGR-A10	561703-b2	ATCTACGGCTTCTTCGTCGTATCC
BNGR-A11	576490-f1	CGAACCTTTTCATAACGAACCTGGC
BNGR-A11	576490-b1	AGCAATCTCCCGAACACCCATC
BNGR-A12	284261-f1	TGTATGGGACGGACTCTGTGTTCG
BNGR-A12	284261-b1	CGCTTCCTCTCCTTCATCAGCC
BNGR-A13	139264-f1	AGCCGAACAAACCGCACCAC
BNGR-A13	139264-b1	AGGTCGCCGAACATACTGTAGCAG
BNGR-A14	27095-f2	GCAACAGGAACCCAACAACAGAGAG
BNGR-A14	27095-b2	CTAATCGTAAGTATGGTGACCCCGTC
BNGR-A15	28835-f1	TTCTCGTCTGCTACCCATACCCC
BNGR-A15	28835-b1	CATCTGTCGCTGAGTCCCTTGC
BNGR-A16	115836-f1	TGACTGAGACTTGGTTCCTTGGGG
BNGR-A16	115836-b1	CCAGCGGTCCACAGAGATGAAAG
BNGR-A17	1868-f1	GGGCATCGCTGGAATCTTCG
BNGR-A17	1868-b1	CGTAGTGACCAACCATTTCAGGGAC
BNGR-A18	25671-f1	TGAAGGAGGAGATGGAGAGGGC
BNGR-A18	25671-b1	CACCGACGACACGATGAGAAGC
BNGR-A19	31212-f1	GGTATGCCCTATGTTTGGTTCGC
BNGR-A19	31212-b1	CCTTCACAGATGCTGGAATGATGAC
BNGR-A20	235007-f1	TGAGTATGTTCCATTCGCTATCTACAGG
BNGR-A20	235007-b1	GGTATCGCCAAACTGCCAGAGAC
BNGR-A21	493983-f1	GGATGTCTGTTGTTATTGTGGCTGC
BNGR-A21	493983-b1	GCTCCTCACTTTGGTTTTTGTCTGG
BNGR-A22	170408-f2	TTTACTTTGCCATTGACCGCTCTC
BNGR-A22	170408-b2	AGTCCCGACCACTTTCTGCTTCTC
BNGR-A23	197745-f1	TGAAATAGACCCAGGCACTAAGTTGG
BNGR-A23	197745-b1	TCACGCACAAAGGAATCACATACTGA
BNGR-A24	16941-f2	GATTCGCAAAACGCAACCGAG
BNGR-A24	16941-b2	GGTGACGCTTCTCATCCGCTTG
BNGR-A25	130251-f1	TCGCCTTTTGCTGTCTACACCG
BNGR-A25	130251-b1	AGAAGAAGAAGATGCTGCTTAGTTCCAG
BNGR-A26	427955-f1	TTCCAGGAGGACCAAGACTATGAGG
BNGR-A26	427955-b1	CGAACACGAAAACAATGACGAATGTC
BNGR-A27	803226-f1	GCCTCCTGTTCTTCATCCTCCCTG
BNGR-A27	803226-b1	ATGGACACTGCCGTTGACACCG
BNGR-A28	671595-f1	CACTATTGTCACTGTCTTCGCTTGTTG
BNGR-A28	671595-b1	TCTAAGGTCCACGGTGTAGGAGCC
BNGR-A29	52583-f1	AACCATTGTGTCAGTCTTCGCTTTG
BNGR-A29	52583-b1	ATGTCCAGGGTGTAGGAGCCGTAG
BNGR-A30	548900-f2	CTTCGTATTCGTCCTCTGCTGGTC
BNGR-A30	548900-b2	GCGGGGCGAGACTTTGTATGAG
BNGR-A31	169191-f2	GACAAAAGTAAAAGGTCCGCCAGC
BNGR-A31	169191-b2	ATGAGCATCCGCACGACACC
BNGR-A32	151878-f1	CAAGAGTTGGAGTGAAGACTGCCTG
BNGR-A32	151878-b1	GCGGTGTAGAAGAACGACATCCC
BNGR-A33	449627-f1	GCTGGCGATGGCAAACTCTATG
BNGR-A33	449627-b1	TGCTCGGCTGAACGAAGATACG
BNGR-A34	603510-f1	TGGCACCTACTCCTCACGATGC
BNGR-A34	603510-b1	GCTTTTCCCTTGGCTCTGGTTACC
BNGR-A35	16962-f1	TTCATTCTGGTCTACGCTGTTCCC
BNGR-A35	16962-b1	GCTGTTGACTGTTAGCACTGCCTTC
BNGR-B1	547803-f1	TCCAACTACACCACCTGCGTCGTC
BNGR-B1	547803-b1	TACAAGAGGATGGCGAGGGAGAGC
BNGR-B2	499349-f1	TGAAGAGGATGAAACGGGAGCG
BNGR-B2	499349-b1	TGAGCACTTGGACGAGCATTGC
BNGR-B3	701080-f1	AAGGATTCGTCGTCGCAATACTTTAC
BNGR-B3	701080-b1	AGGGTCAACGCTCATACTTGGATG
BNGR-B4	6638-f1	GGAACAGAACGATGCTGGATGG
BNGR-B4	6638-b1	CGGCTTCATTCGGCTGATTTG
AKHR	AKHR-f1	TCTGTGGTATTGGATTGACAAGGAGTC
AKHR	AKHR-b1	GCGACATCGTCCGTTCTGAAAC
BAR	BAR-f1	TGCTGTCTGCTGGTGCCCTATTC
BAR	BAR-b1	GCAACCCTGAAGTTTTCCGAGAGG
BMSR	BMSR-f1	GCAGGCGTTATTTGGCTTACTGAC
BMSR	BMSR-b1	TTGTGGAAGTGGCAGGACCTTTC
BRFaR	BRFaR-f1	TCACCTCCGTGCTGCTCTTTGG
BRFaR	BRFaR-b1	CGTTGGCTATGGGGTAGGCGTA
DHR	DHR-f1	CATCAGGTGGACTGGATACACAAAGC
DHR	DHR-b1	CGAGCGGAGTTTCGTAATCAGCAC
DpHR	DpHR-f1	ACAAGATGTGTCGGAAGCCAAGTC
DpHR	DpHR-b1	GGATTTTGCGAGGTGATTTTCGT
PBANR	PBANR-f1	GGTCATCAGAATGCTCGTTGCTG
PBANR	PBANR-b1	GTTCCAAACTCTTCCCATAAATCGC
SIFR	SIFR-f1	CCTGGTCATCGTGTTCTGTCTGC
SIFR	SIFR-b1	TCTGTCAAGGGATACGGCAACG
